# Supplementary material for: The effect of interleukin-22 treatment on autoimmune diabetes in the NOD mouse
Source: Springer Nature journal article supplement (doi:10.1007/s00125-017-4392-2), 2017-08-04
Supplement: MOESM1 [file 13349490]

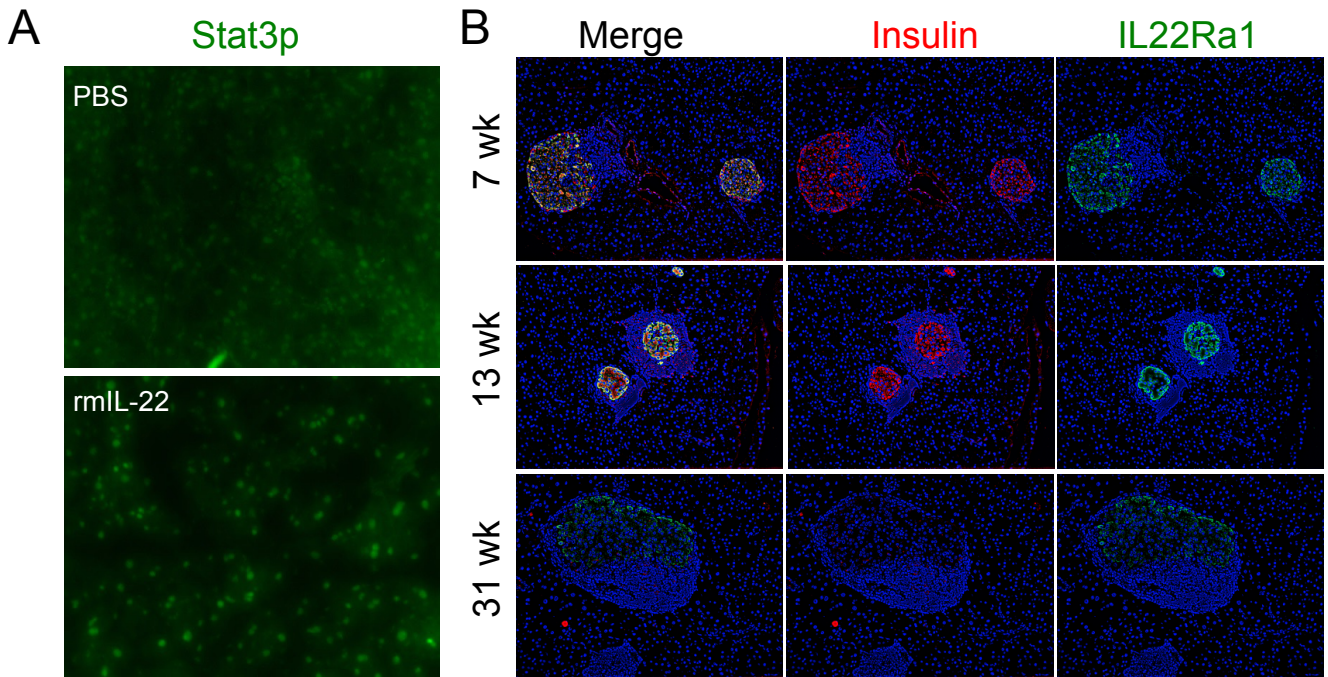

ESM Fig. 1: (a) Representative images of immunofluorescent staining with STAT3p antibody of NOD mice ( $n=4$ ) pancreases treated with PBS or 200 ng/g rmlL-22 for 30 min. (b) Immunofluorescence was used to determine the levels of IL-22 receptor (IL-22RA1; green) in pancreatic islets (insulin; red) from NOD mice at 7, 13 and 31 weeks of age
